# Supplementary material for: Facile preparation of Hf3N4 thin films directly used as electrodes for lithium-ion storage
Source: Royal Society of Chemistry journal article supplement (doi:10.1039/d4nh00406j), 2024-01-01
Supplement: d4nh00406j1.pdf [file d4nh00406j1.pdf]

## **Facile Preparation of $\text{Hf}_3\text{N}_4$ Thin Films Directly Used as the Electrodes for Lithium-Ion Storage**

*Zhengguang Shi,<sup>ab</sup> Geng Yu,<sup>ab</sup> Jing Li,<sup>ab</sup> Zhenggang Jia,<sup>c</sup> Xuexi Zhang,<sup>c</sup> Cheng-Te Lin,<sup>d</sup> Qianru Lin,<sup>b</sup> Zhaoyu Chen,<sup>b</sup> Hsu-Sheng Tsai<sup>\*ab</sup>*

*<sup>a</sup> School of Physics, Harbin Institute of Technology, 150001, Harbin, China*

*<sup>b</sup> Laboratory for Space Environment and Physical Sciences, Harbin Institute of Technology, 150001, Harbin, China*

*<sup>c</sup> School of Materials Science and Engineering, Harbin Institute of Technology, 150001, Harbin, China*

*<sup>d</sup> Key Laboratory of Marine Materials and Related Technologies, Zhejiang Key Laboratory of Marine Materials and Protective Technologies, Ningbo Institute of Materials Technology and Engineering (NIMTE), Chinese Academy of Sciences, 315201, Ningbo, China*

*\*Corresponding author. E-mail: [hstsai@hit.edu.cn](mailto:hstsai@hit.edu.cn)*

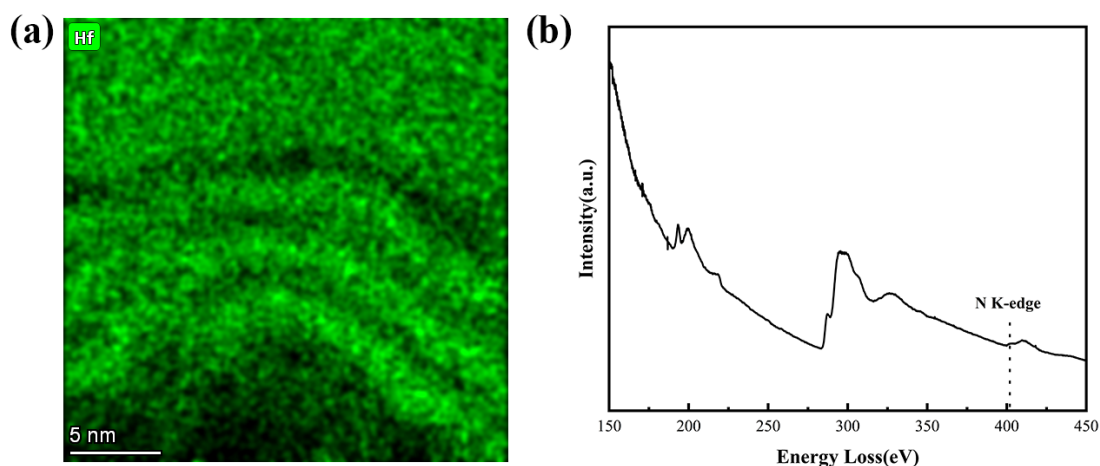

**Fig. S1** (a) The EDS mapping image of  $\text{Hf}_3\text{N}_4$  film transverse; (b) The EELS point scan result of  $\text{Hf}_3\text{N}_4$  film transverse.

**Table S1** Comparison of the crystal plane spacing of  $\text{Hf}_3\text{N}_4$  thin films with the values from  $\text{Hf}_3\text{N}_4$ -JCPDS.

| The work (Å) | $\text{Hf}_3\text{N}_4$ ( JCPDS 01-083-6354) (Å) | Crystal plane |
|--------------|--------------------------------------------------|---------------|
| 2.768        | 2.794                                            | (200)         |
| 2.620        | 2.610                                            | (111)         |
| 2.570        | 2.565                                            | (201)         |
| 2.323        | 2.140                                            | (112)         |
| 2.011        | 2.029                                            | (211)         |
| 1.870        | 1.809                                            | (013)         |
| 1.811        | 1.809                                            | (013)         |
| 1.715        | 1.721                                            | (113)         |
| 1.424        | 1.427                                            | (220)         |
| 1.211        | 1.216                                            | (321)         |
| 1.014        | 1.015                                            | (422)         |
| 0.902        | 0.901                                            | (134)         |
| 0.823        | 0.824                                            | (425)         |

According to the volume  $V$  ( $1.13 \times 10^{-7} \text{ cm}^3$ ) of the film and the experimental volume density  $P$  ( $11.59 \text{ g/cm}^3$ ), the mass  $m$  is calculated as  $0.013 \text{ mg}$  according to Eq. S1.

$$m = V \times P \dots\dots\dots \text{Eq. S1}$$

According to the total reaction formula (Eq. S2) and the theoretical capacity calculation formula (Eq. S3), the theoretical capacity of the active substance after all reactions can be calculated as  $543.7 \text{ mAhg}^{-1}$ .

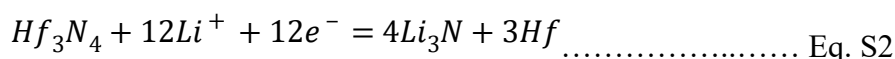

$$C_0 = \frac{Fnm}{3600M} \dots\dots\dots \text{Eq. S3}$$

Where  $C_0$  is the theoretical capacity,  $F$  is the Faraday constant,  $n$  is the charge transfer number,  $m$  is the mass of  $\text{Hf}_3\text{N}_4$ , and  $M$  is the molar mass of  $\text{Hf}_3\text{N}_4$ .

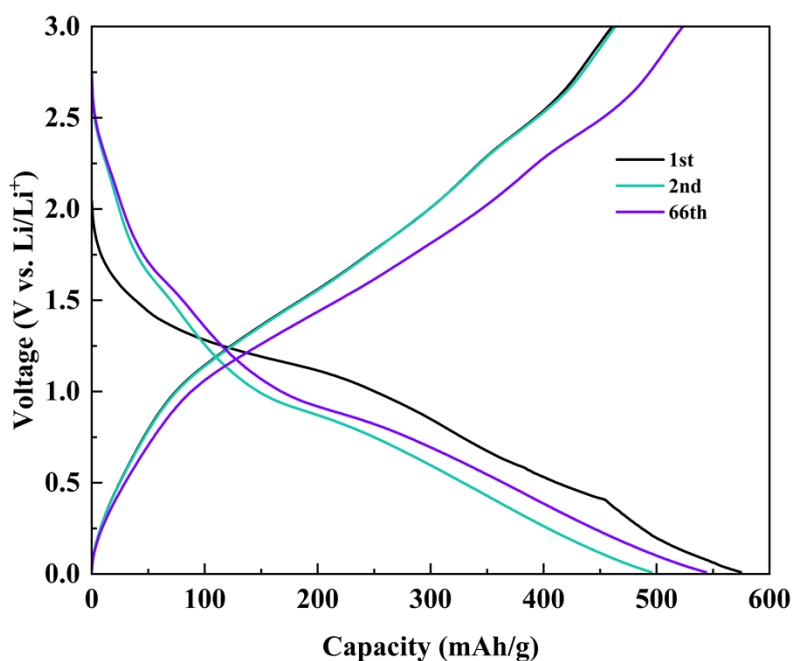

**Fig. S2** The galvanostatic charge-discharge curves of the orthorhombic  $\text{Hf}_3\text{N}_4$  thin film electrode at the current density of  $0.1 \text{ A g}^{-1}$  in the 1st, 2nd, and 66th cycles.

**Table S2** The characteristics and battery performances of TMN thin film electrodes for LIBs.

| Materials                     | Production methods                          | Rate capability                                        | Cycling performance                                                                |
|-------------------------------|---------------------------------------------|--------------------------------------------------------|------------------------------------------------------------------------------------|
| $\text{TiN}^{[1]}$            | Sputtering deposition at RT                 | $99 \text{ mA h g}^{-1}$ at $1 \text{ mA cm}^{-2}$     | $206 \text{ mA h g}^{-1}$ at $25 \text{ } \mu\text{A cm}^{-2}$ after 50 cycles     |
| $\text{FeN}^{[2]}$            | Sputtering deposition at RT                 | $469 \text{ mA h g}^{-1}$ at $10 \text{ A g}^{-1}$     | $1020.4 \text{ mA h g}^{-1}$ at $0.2 \text{ A g}^{-1}$ after 100 cycles            |
| $\text{Ni}_2\text{N}^{[3]}$   | Sputtering deposition at RT                 | $191.7 \text{ mA h g}^{-1}$ at $2.24 \text{ A g}^{-1}$ | $461.9 \text{ mA h g}^{-1}$ at $0.12 \text{ A g}^{-1}$ after 100 cycles            |
| $\text{RuN}^{[4]}$            | Sputtering deposition at $50^\circ\text{C}$ | $260 \text{ mA h g}^{-1}$ at $1.17 \text{ A g}^{-1}$   | $330 \text{ mA h g}^{-1}$ at $117 \text{ mA g}^{-1}$ after 70 cycles               |
| $\text{Mo}_2\text{N}^{[5]}$   | Sputtering deposition at RT                 | $252 \text{ mA h g}^{-1}$ at $2 \text{ A g}^{-1}$      | N/A                                                                                |
| $\text{MoN}_x^{[6]}$          | ALD at RT                                   | N/A                                                    | $696 \text{ mA h g}^{-1}$ at $100 \text{ } \mu\text{A cm}^{-2}$ after 100 cycles   |
| $\text{Ti}_2\text{N}^{[7]}$   | Sputtering deposition at RT                 | $450 \text{ mA h g}^{-1}$ at $0.1\text{C}$             | $450 \text{ mA h g}^{-1}$ at $0.1\text{C}$ after 100 cycles                        |
| $\text{Mn}_3\text{N}_2^{[8]}$ | Sputtering deposition at RT                 | N/A                                                    | $\sim 400 \text{ mA h g}^{-1}$ at $0.16 \text{ A g}^{-1}$ after 300 cycles         |
| $\text{Ni}_3\text{N}^{[9]}$   | PLD at $200^\circ\text{C}$                  | N/A                                                    | $\sim 325 \text{ mA h g}^{-1}$ at $7 \text{ } \mu\text{A cm}^{-2}$ after 40 cycles |
| $\text{Co}_3\text{N}^{[10]}$  | PLD at $200^\circ\text{C}$                  | N/A                                                    | $\sim 350 \text{ mA h g}^{-1}$ at $7 \text{ } \mu\text{A cm}^{-2}$ after 40 cycles |

RT: room temperature.

(1) Raman, K. H. T.; Penki, T. R.; Munichandraiah, N.; Rao, G. M. Titanium nitride

- thin film anode: chemical and microstructural evaluation during electrochemical studies. *Electrochim. Acta* **2014**, *125*, 282-287.
- (2) Ma, Z.; Li, Z.; Zeng, Y.; Li, P.; Zhang, H. High electrochemical performance of  $\gamma$ -FeN thin film electrode for lithium ion batteries. *J. Power Sources* **2019**, *423*, 159-165.
- (3) Ma, Z.-y.; Zhang, H.; Sun, X.; Guo, J.; Li, Z.-c. Preparation and characterization of nanostructured Ni<sub>2</sub>N thin film as electrode for lithium ion storage. *Appl. Surf. Sci.* **2017**, *420*, 196-204.
- (4) Laïk, B.; Bourg, S.; Pereira-Ramos, J.-P.; Bruyère, S.; Pierson, J.-F. Electrochemical reaction of lithium with ruthenium nitride thin films prepared by pulsed-DC magnetron sputtering. *Electrochim. Acta* **2015**, *164*, 12-20.
- (5) Wang, L.; Li, L.; Guo, X.; Zhang, J.; Liu, P.; Yan, J. Porous Mo<sub>2</sub>N nano-column array thin film electrode for lithium ion storage. *Results Phys.* **2019**, *15*, 102715.
- (6) Nandi, D. K.; Sen, U. K.; Choudhury, D.; Mitra, S.; Sarkar, S. K. Atomic Layer Deposited Molybdenum Nitride Thin Film: A Promising Anode Material for Li Ion Batteries. *ACS Appl. Mater. Interfaces* **2014**, *6* (9), 6606-6615.
- (7) Tsai, H.-S.; Hsu, C.-H.; Chi, C.-C.; Wang, Y.-C.; Liu, F.-W.; Tang, S.-Y.; Tsai, C.-J.; Ouyang, H.; Chueh, Y.-L.; Liang, J.-H. Non-layered Ti<sub>2</sub>N synthesized by plasma process for the anodes of lithium-ion batteries. *Inorg. Chem. Front.* **2019**, *6*, 172-175.
- (8) Sun, Q.; Fu, Z.-W. Mn<sub>3</sub>N<sub>2</sub> as a novel negative electrode material for rechargeable lithium batteries. *Appl. Surf. Sci.* **2012**, *258* (7), 3197-3201.
- (9) Wang, Y.; Fu, Z.-W.; Yue, X.-L.; Qin, Q.-Z. Electrochemical Reactivity Mechanism of Ni<sub>3</sub>N with Lithium. *J. Electrochem. Soc.* **2004**, *151* (4), E162.
- (10) Fu, Z.-W.; Wang, Y.; Yue, X.-L.; Zhao, S.-L.; Qin, Q.-Z. Electrochemical Reactions of Lithium with Transition Metal Nitride Electrodes. *J. Phys. Chem. B* **2004**, *108* (7), 2236-2244.

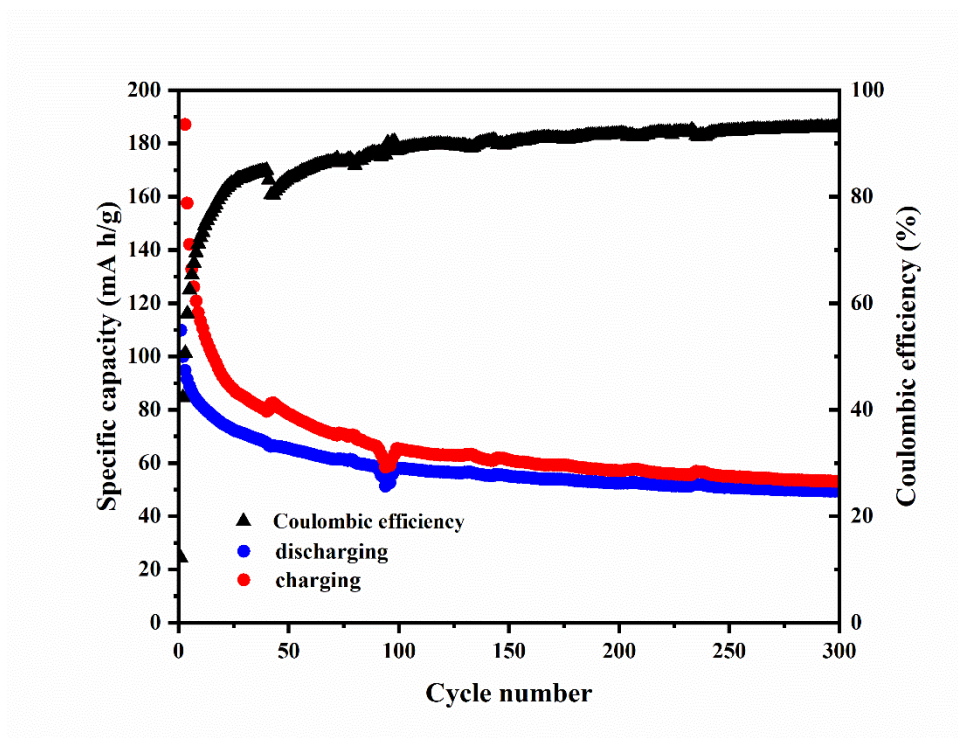

**Fig. S3** The cycling performance of full-cells fabricated using the orthorhombic  $\text{Hf}_3\text{N}_4$  thin film anodes and the  $\text{LiFePO}_4$  cathodes at the current density of  $0.1 \text{ A g}^{-1}$ .
